# Supplementary material
Source: publisher site journal article supplement (https://www.dovepress.com/article/90969)
Supplement: Supplementary file 1 [file get_supplementary_file.php]

|    | Sex | Age | Dx (es)     | Specific Symptoms                                                                                                                     | Age of onset | Psychiatric comorbidities        | Medical comorbidities and past med history                                                   | Psychiatric medication trials                                                                                              | ECT (# sessions, electrode placement) | Outcome (1 month)               | Description                                                               | Long term outcome                                                                                                               |
|----|-----|-----|-------------|---------------------------------------------------------------------------------------------------------------------------------------|--------------|----------------------------------|----------------------------------------------------------------------------------------------|----------------------------------------------------------------------------------------------------------------------------|---------------------------------------|---------------------------------|---------------------------------------------------------------------------|---------------------------------------------------------------------------------------------------------------------------------|
| 1  | F   | 50  | CD          | Gait disturbance and extremities tremor                                                                                               | 42           | MDD                              | Nil                                                                                          | <u>Current:</u> CIT, NOR, VENX, QUE, OLZ<br><u>Past:</u> CZM, TOP, DEX                                                     | 12, RUL/BF                            | Improved                        | Improvement in tremor<br>Subjective improvement in depression             | Improvements sustained for one year after ECT.                                                                                  |
| 2  | F   | 36  | CD          | Quadriplegia, bowel and bladder incontinence, pseudoseizures                                                                          | 23           | MDD, PTSD, DA                    | HTN                                                                                          | <u>Current:</u> BAC, CZM, GAB, QUE, VENX<br><u>Past:</u> CIT, DZM, RISP                                                    | 22, RUL/BF                            | Improved                        | Improvement in quadriplegia and in depression (-6 on GDS)                 | Lost to follow-up                                                                                                               |
| 3  | M   | 44  | CD          | Episodic confusion and cognitive dysfunction pseudoseizures, dyskinesia                                                               | 25           | Nil                              | Nil                                                                                          | <u>Current:</u> BUPR, FLUX, LITH, LRZ, LEVM, QUE<br><u>Past:</u> CZM, LIO, RISP, VENX, VIT B12                             | 12, RUL/BF                            | Improved                        | Improvement in depression (-12 on GDS), dyskinesia and episodic confusion | Improvement sustained at least 5 month post ECT.                                                                                |
| 4  | F   | 44  | CD          | Cognitive dysfunction, mutism, pseudoseizures, gait disturbance, pain,                                                                | 41           | MDD                              | History of TBI                                                                               | <u>Current:</u> FLUX, DEX, OXYC, PHYN, RISP<br><u>Past:</u> CZM, DLX, ECIT, GAB, LRZ, MTP, QUE                             | 17, RUL/BF                            | Improved                        | Improvement in depression and gait disturbance                            | Lost to follow-up                                                                                                               |
| 5  | M   | 49  | CD          | Cognitive dysfunction, extremities weakness, IBS                                                                                      | 41           | MDD, GAD, OCD                    | History of viral encephalitis                                                                | <u>Current:</u> Nil<br><u>Past:</u> FLUX, SERT                                                                             | 10, BF                                | Improved                        | Improvement in depression(subjectively, +2 on GDS) and in mobility        | Symptoms relapsed 1 month after ECT, requiring re-admission.                                                                    |
| 6  | M   | 62  | CD, PD      | Extremities weakness, hypoesthesia in lower extremity, chronic headache, pain in neck, back, shoulder                                 | 49           | MDD, PTSD, SP, PDNOS             | History of MI, disc herniation                                                               | <u>Current:</u> CIT, RISP, TRZ<br><u>Past:</u> BUPR, NOR, OLZ, SERT                                                        | 4, BF                                 | Improved                        | Improvement in depression and in weakness                                 | Improvement sustained for 2 months, then relapsed, requiring readmission and second regiment of ECT.                            |
| 7  | F   | 64  | CD, SMD, PD | Pan-corporeal pain x7 years, severe nocturnal spasms                                                                                  | 57           | MDD, ADNOS                       | History of TBI                                                                               | <u>Current:</u> TRZ, DZM, COD<br><u>Past:</u> Nil                                                                          | 15RUL/BF                              | Improved                        | Improvement in depression and in nocturnal spasm                          | Improvement maintained for 6 weeks post-ECT. Outpatient maintenance ECT required to maintain improvement                        |
| 8  | F   | 38  | CD          | Decreased balance, hemiparesis, decreased coordination                                                                                | 35           | MDD, OCPD, ADNOS                 | Nil                                                                                          | <u>Current:</u> DESP, ZOPL<br><u>Past:</u> APZ, CIT, DEX, ECIT, NOR, PRX, TMZ, TZL, VEN                                    | 13, RUL                               | No change, ECT was discontinued | Improvement in depression (-14 on BDI), no change in somatic symptoms     | Lost to follow-up                                                                                                               |
| 9  | F   | 35  | CD, PD      | Extremities pain, vertigo, decreased vision                                                                                           | 32           | MDD, PTSD,                       | History of malaria                                                                           | <u>Current:</u> BUPR, CZM, OXA, SERT<br><u>Past:</u> AMTP, CIT, MIR, QUE, VEN                                              | 13, RUL/BF                            | Improved                        | Improvement in vision, in vertigo, in movement and in depression          | Symptoms improvement sustained for two months, then relapsed requiring re-admission and more ECTs.                              |
| 10 | F   | 65  | CD, PD      | Paresthesia in right fingers, stress incontinence, right parieto-occipital pain                                                       | 56           | MDD, alcohol use disorder, ADNOS | Hyperthyroidism, GERD, history of pelvic fracture, history of abdominal hernia, hysterectomy | <u>Current:</u> ESTR, FLUX, LEVT, MIR, RISP<br><u>Past:</u> APZ, CZM, NITZ, OXYB, OXC, PIM, SERT, TRZ, VEN, ZOPL           | 21, RUL/BF                            | Improved                        | Improvement on all conversion symptoms and in depression                  | Readmitted one year after for adjustment disorder, no ECT                                                                       |
| 11 | F   | 39  | CD          | Paresthesia, aphasia, decreased balance, clumsiness, pseudoseizures, lower extremity muscles spasm, hemiparesis, urinary incontinency | 34           | MDD                              | History of herpes simplex infection, asthma, history of PID, IBS, history of uterine cancer  | <u>Current:</u> DEX, ESZP, FLUX, LRZ, RISP, TEGA, VAPR<br><u>Past:</u> AMTP, BUPR, CIT, DESP, DOX, MIR, NOR, OLZ, TOP, TRZ | 9, RUL                                | Improved                        | Improvement in depression, in pseudoseizures                              | From 2006 -2011, 2 other admissions for major depression, pseudoseizures waxes and wanes over the years, no other course of ECT |
| 12 | F   | 56  | CD          | Decreased vision, vertigo                                                                                                             | 49           | MDD, PaD, PTSD, DA, PDNOS        | DM2, DLP, history of TBI, history of seizure disorder, asthma                                | <u>Current:</u> CIT, CMZ, CZM, MIR, OLZ, PHYN<br><u>Past:</u> LIO, TOP, VEN                                                | 11, RUL/BF                            | Improved                        | Improvement in depression and in vision                                   | Lost to follow-up                                                                                                               |

|        |   |    |        |                                                                                             |    |                           |                                                                                                            |                                                                                                                         |            |           |                                                                                                                   |                                                                                              |
|--------|---|----|--------|---------------------------------------------------------------------------------------------|----|---------------------------|------------------------------------------------------------------------------------------------------------|-------------------------------------------------------------------------------------------------------------------------|------------|-----------|-------------------------------------------------------------------------------------------------------------------|----------------------------------------------------------------------------------------------|
| 1<br>3 | M | 60 | CD, PD | Involuntary movement of leg and trunk, severe low back pain                                 | 50 | MDD                       | Sleep apnea, hyperthyroidism, history of bodily trauma, history of coccyx fracture, abdominal hernia       | <u>Current</u> : LIO, PRX, QUE, ZOPL<br><u>Past</u> : GAB, MORP, NOR, SERT, TRZ                                         | 14, RUL/BF | Improved  | Improvement in involuntary movement.                                                                              | Significant deterioration 2 months following discontinuation of ECT, requiring re-admission  |
| 1<br>4 | F | 53 | CD, PD | Involuntary movements, muscle weakness and spasms, paresthesia, abnormal gait, chronic pain | 50 | MDD, PTSD                 | Hyperthyroidism, ovarian cysts, history of cholecystectomy                                                 | <u>Current</u> : PREG, MTPZ, LIO<br><u>Past</u> : AMTP, BUPR, CYCP, PRX, VEN                                            | 13, BF     | Improved  | Improvement in all conversion symptoms and depression, symptoms relapsed 2 weeks following discontinuation of ECT | Over the years, patient required multiple course of ECT for severe depression +/- psychosis. |
| 1<br>5 | M | 56 | CD, PD | Episodic leg weakness, urinary incontinence, chronic pain in extremities                    | 53 | MDD                       | Sleep apnea, HTN, DLP, obesity, DM2, peripheral neuropathy, history of uvuloplasty, meningeal encephalitis | <u>Current</u> : APZ, FLUX, MORP, PHYN, RISP<br><u>Past</u> : BUPR, CIT, DEX, FLUV, LRZ, MTP, PRX, SERT, TRZ, VEN, ZOPL | 11, BF     | Improved  | Improvement in pain and in function (i.e. ambulation) and in depression                                           | Lost to follow-up                                                                            |
| 1<br>6 | M | 41 | CD     | Pseudoseizures                                                                              | 39 | MDD, PDNOS, ADNOS         | Migraine, HTN, DLP, GERD, asthma, history of eye injury, strabismus, quadrantanopsia                       | <u>Current</u> : IMIP, LITH, LOX, LRZ<br><u>Past</u> : BUPR, CLOZ, DEX, HAL, LIO, MIR, OLZ, PRX, VAPR, VEN              | 14, BF     | No change | No change in pseudoseizures and other psychiatric symptoms                                                        | Lost to follow-up                                                                            |
| 1<br>7 | F | 19 | CD     | Pseudoseizures                                                                              | 18 | MDD, DD, PTSD, ADNOS, BPD | Ovarian cysts, history of TBI                                                                              | <u>Current</u> : OLZ, OXA, MIR, VEN<br><u>Past</u> : CIT, CZM, GAB, PHYN                                                | 7, RUL     | Improved  | Decrease frequency of pseudoseizures, improvement in depression                                                   | Improvement sustained for less than 6 months following discontinuation of ECT                |
| 1<br>8 | F | 43 | CD, PD | Involuntary movements, tremors, whole body pain after MVA                                   | 32 | MDD, PTSD                 | Fibromyalgia, psoriasis, asthma, thoracic outlet syndrome, history of TBI                                  | <u>Current</u> : BAC, CIT, OXYB, PREG, RISP, SERT, TRZ<br><u>Past</u> : BUPR, FLUX, GAB, NOR, OXYC, PRX                 | 13, RUL    | Improved  | Improvement in pain, in involuntary movement and in depression (-20 on BDI). Pain returned 10 days post-ECT       | Chronic course of illness, lost to follow-up                                                 |
| 1<br>9 | F | 35 | PD     | Pan-corporeal pain                                                                          | 33 | MDD, PDNOS                | Fibromyalgia, history of seizure disorder, lung lobectomy                                                  | <u>Current</u> : CZM, ECIT, GAB, ZIPR<br><u>Past</u> : DLX, OLZ, PIM, RISP                                              | 6, RUL     | Worsened  | Pain worsened                                                                                                     | Readmission 1 year after for PD                                                              |
| 2<br>0 | M | 50 | SDNOS  | IBS                                                                                         | 22 | MDD, SP                   | DM2, peripheral neuropathy, DLP, asthma, history of TBI                                                    | <u>Current</u> : BUPR, MTP, TRZ, MTP<br><u>Past</u> : CLOM, DEX, NOR, PRX, SERT, VAPR, VEN                              | 10, RUL    | No change | No significant change, stable mood symptoms (-5 on BDI)                                                           | Second course of ECT with no significant clinical benefits                                   |
| 2<br>1 | F | 38 | CD, PD | Pain, right arm weakness                                                                    | 16 | MDD, PDNOS                | RSD, migraine, endometriosis (hysterectomy)                                                                | <u>Current</u> : AMOX, LOX, NITZ, NOR, TRZ, VAPR<br><u>Past</u> : DEX, DOX, GAB, PIM, PREG, QUE, TMZ, TOP               | 10, RUL/BF | Worsened  | Pain symptoms worsened, Improvement in depressive and psychotic symptoms                                          | Two months post-ECT, patient requested second course of ECT for mood                         |
| 2<br>2 | F | 43 | CD     | Aphasia, right hemiparesis                                                                  | 41 | MDD, PTSD                 | Arthritis, DM2, HTN, peripheral neuropathy, history of pneumonitis, cholecystectomy, hysterectomy          | <u>Current</u> : CIT, CZM, GAB, OXYC, QUE, ZOPL<br><u>Past</u> : OXA, TRZ, VEN                                          | 11, BT     | Improved  | Significant improvement in somatoform symptoms, and in depression, no longer require assistance for ADLs          | Pt required ongoing maintenance ECTs.                                                        |
| 2<br>3 | M | 56 | PD     | Severe jaw/facial, right body pain                                                          | 51 | MDD, PDNOS, SP            | HTN, DLP                                                                                                   | <u>Current</u> : BAC, FLUX, GAB, MIR, NOR<br><u>Past</u> : N/A (missing data)                                           | 12, RUL/BF | Worsened  | Pain symptoms worsened, some improvement in depressive symptoms                                                   | Lost to follow-up                                                                            |
| 2<br>4 | M | 45 | CD, PD | Aphasia, weakness, gait abnormalities, paresthesia, stool incontinence, pan-corporeal pain  | 43 | MDD, ADNOS                | Arthritis, history of nose surgery, cholecystectomy, abdominal hernia, appendicitis                        | <u>Current</u> : QUE, CZM, NOR, QUE, SERT<br><u>Past</u> : BUPR                                                         | 8, RUL     | Improved  | Improvement in somatoform and mood symptoms                                                                       | Lost to follow-up                                                                            |

|    |   |    |               |                                                                                                                                   |    |                                                      |                                                                                 |                                                                                                           |             |          |                                                |                                                                                          |
|----|---|----|---------------|-----------------------------------------------------------------------------------------------------------------------------------|----|------------------------------------------------------|---------------------------------------------------------------------------------|-----------------------------------------------------------------------------------------------------------|-------------|----------|------------------------------------------------|------------------------------------------------------------------------------------------|
| 25 | M | 52 | PD            | Chronic pain                                                                                                                      | 45 | MDD, PTSD, ADHD, ADNOS                               | Sleep apnea, HTN, DLP, obesity, tinnitus, GERD, history of hip replacement, TBI | <u>Current:</u> AMTP, BUS, FLUX, PREG<br><u>Past:</u> APZ, BUPR, DEX, GAB, MORP, MTP, QUE, RISP, ZOPL     | 20, RUL, BF | Improved | Improvement in pain and in depression          | Symptoms relapsed at 6 months follow-up, requiring further ECTs                          |
| 26 | M | 74 | CD            | Gait abnormalities, head nodding, body tremor                                                                                     | 53 | MDD                                                  | Peripheral neuropathy, HTN, GERD, COPD, history of knee surgery, TBI            | <u>Current:</u> CZM, PRX, SERT<br><u>Past:</u> CHLD, NOR, OLZ, PRIM, QUE                                  | 3, BF       | Improved | Improvement in somatic symptoms and depression | Improvement sustained for a year, more ECT required                                      |
| 27 | M | 61 | CD, PD, SDNOS | Paresthesia, cognitive dysfunction, fatigue, decreased balance, shortness of breath, urinary incontinence, pain in face and limbs | 52 | MDD, PDNOS, ADNOS                                    | Pulmonary sarcoidosis                                                           | <u>Current:</u> DEX, MIR, ZIPR<br><u>Past:</u> AMTP, BUPR, DZM, GAB, LRZ, NOR, PREG, RISP, TOP, VEN, ZOPL | 11, RUL/BF  | Improved | Improvement in somatic symptoms and depression | Required maintenance ECT to maintain clinical improvement                                |
| 28 | F | 36 | CD            | Pseudoseizures                                                                                                                    | 34 | MDD, PTSD, PDNOS, alcohol and cannabis use disorders | IBS, History of TBI                                                             | <u>Current:</u> CZM, FLUX, MORP, OLZ<br><u>Past:</u> CMZ, LAM, NOR, PRX, QUE, RISP, SERT, TRZ, VAPR, VEN  | 6, RUL/BF   | Improved | Improvement in pseudoseizures                  | At 2 months post-ECT, symptoms returned to pre-ECT level, requiring second course of ECT |
